# Supplementary material for: The Relationship between Diabetic Neuropathy and Sleep Apnea Syndrome: A Meta-Analysis
Source: Sleep Disord. 2013 Dec 7;2013:150371. doi: 10.1155/2013/150371 (PMC3871907; doi:10.1155/2013/150371)
Supplement: Supplementary file 1 — Supplemental Material 1. Study keywords in this meta-analysis. Study keywords were related to diabetes, neuropathy, and sleep apnea, which were combined using the Supplemental Material 2. Results of quality assessment of the included studies using the modified Newcastle-Ottawa Scale. Supplemental Material 3. Flowchart of Meta-analysis. Supplemental Material 4. Forest plot showing the odds ratios (ORs) with 95% confidence intervals (95% CI) of sleep apnea syndrome for participants with type 2 diabetes who have diabetic neuropathy (DN) compared to participants without DN. Pooled OR is indicated by a diamond. A, B, C, D, and E show the results of each forest plot with regard to age, BMI, country, type of DN, and study quality category, respectively. [file 150371.f1.zip]

Archive with 2 entries (2 files):
- 150371.f1/mat.150371.v1.doc
- 150371.f1/mat.150371.v2.doc
